# Supplementary material for: Activation of aryl hydrocarbon receptor signaling by a novel agonist ameliorates autoimmune encephalomyelitis
Source: PubMed Central journal article supplement (PMC6485712; doi:10.1371/journal.pone.0215981), 2019-04-26
Supplement: pone.0215981.s001.pdf [file pone.0215981.s001.pdf]

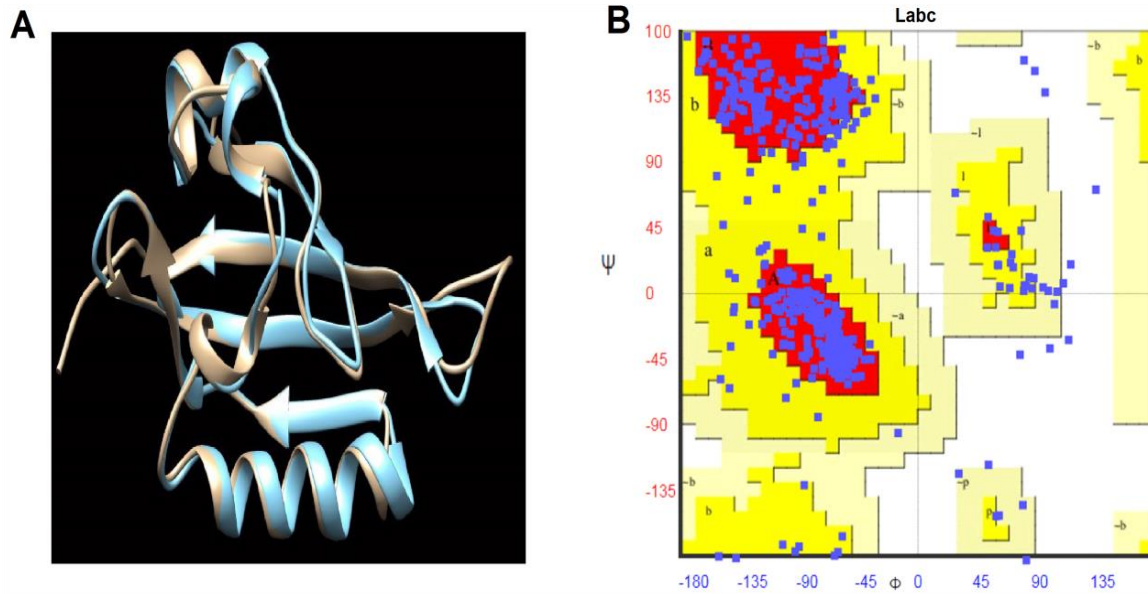

**S1 Fig. *In silico* molecular modeling of mouse Ahr PAS-B domain.** A) Superimposition of predicted 3D structure of mouse Ahr PAS-B domain with the human C-terminal PAS domain of HIF2a (PDB ID: 1p97). (B) Ramachandran plot of predicted mouse Ahr PAS-B domain.
