# Supplementary material for: Activation of aryl hydrocarbon receptor signaling by a novel agonist ameliorates autoimmune encephalomyelitis
Source: PubMed Central journal article supplement (PMC6485712; doi:10.1371/journal.pone.0215981), 2019-04-26
Supplement: pone.0215981.s002.pdf [file pone.0215981.s002.pdf]

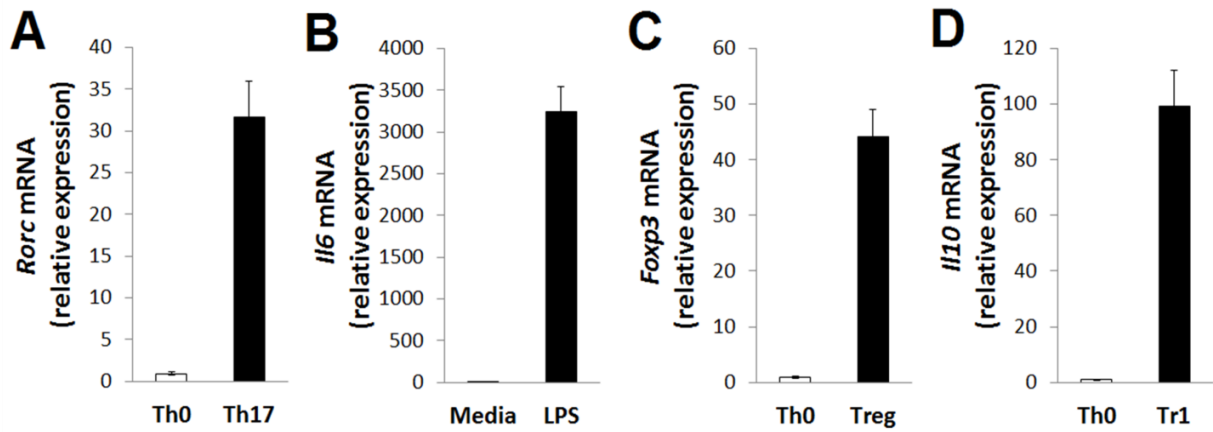

**S2 Fig. Efficiency of cell stimulation milieus.** The CD4<sup>+</sup>CD62L<sup>+</sup> T cells were isolated from the spleen and cultured under Th17-, Treg or Tr1-polarizing conditions, and peritoneal macrophages were cultured in presence of LPS. The mRNA expression of *Rorc*, *Il6*, *FoxP3* and *Il10* were assessed by quantitative real-time PCR and normalized to *Gapdh* mRNA. (A) Relative expression of *Rorc* in CD4<sup>+</sup>CD62L<sup>+</sup> T cells cultured under Th17-conditions for 48 hr compared to Th0. (B) Relative expression of *Il6* mRNA in macrophages stimulated with LPS for 4 hr. (C) Relative expression of *FoxP3* mRNA in CD4<sup>+</sup>CD62L<sup>+</sup> T cells cultured under Treg-polarizing conditions for 48 hr. (D) Relative expression of *Il10* mRNA in CD4<sup>+</sup>CD62L<sup>+</sup> T cells cultured under Tr1-polarizing conditions for 56 hr. Data were pooled from independent experiments and shown as mean ± SD.
