# Supplementary material for: Activation of aryl hydrocarbon receptor signaling by a novel agonist ameliorates autoimmune encephalomyelitis
Source: PubMed Central journal article supplement (PMC6485712; doi:10.1371/journal.pone.0215981), 2019-04-26
Supplement: pone.0215981.s003.pdf [file pone.0215981.s003.pdf]

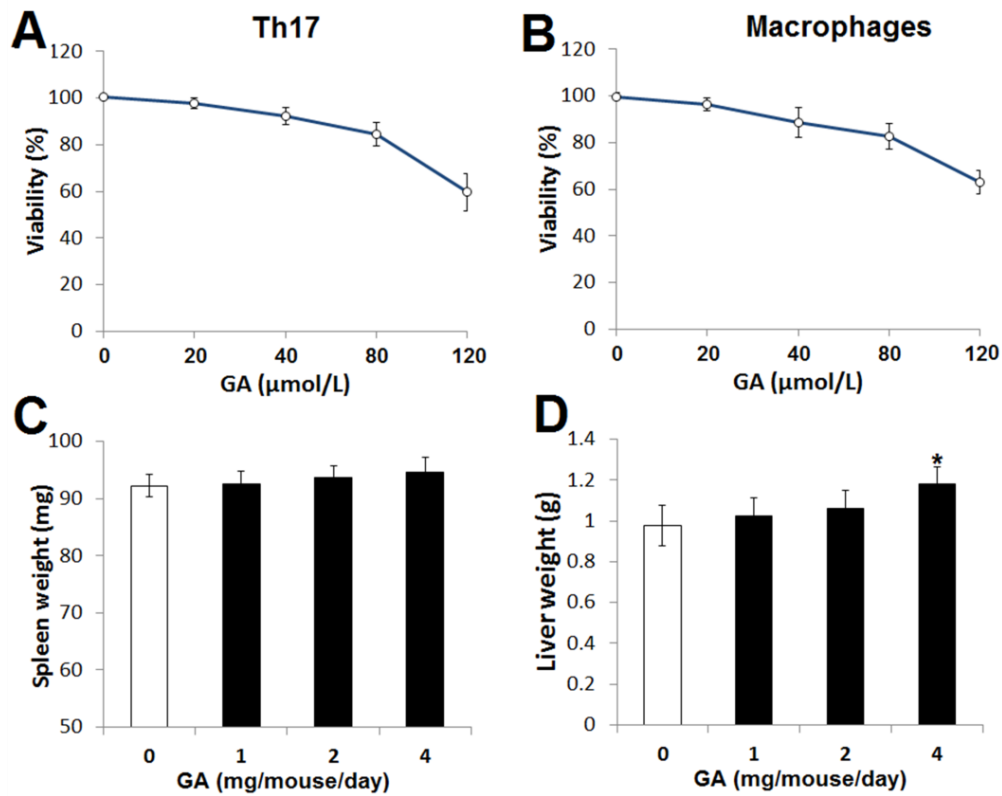

**S3 Fig. High levels of GA show toxic effects.** (A and B) The  $\text{CD4}^+\text{CD62L}^+$  T cells were isolated from the spleen and cultured under Th17-polarizing conditions, and peritoneal macrophages were cultured in presence of LPS. Cell viability of (A) differentiating Th17 and (B) peritoneal macrophages 48 hr after stimulation in presence of GA (20-120  $\mu\text{mol/L}$ ). (C and D) The EAE was induced by immunizing mice with  $\text{MOG}_{35-55}$  emulsified in CFA. The mice were injected intraperitoneally with vehicle (corn oil) or GA (1-4 mg/day) for 14 days starting one day before  $\text{MOG}_{35-55}$  immunization. Weight of (C) spleen and (D) liver were measured 24 h after last dose,  $n=6$ . Data were pooled from independent experiments and shown as mean  $\pm$  SD. \* $p < 0.05$ .
