# Supplementary material for: Activation of aryl hydrocarbon receptor signaling by a novel agonist ameliorates autoimmune encephalomyelitis
Source: PubMed Central journal article supplement (PMC6485712; doi:10.1371/journal.pone.0215981), 2019-04-26
Supplement: pone.0215981.s004.pdf [file pone.0215981.s004.pdf]

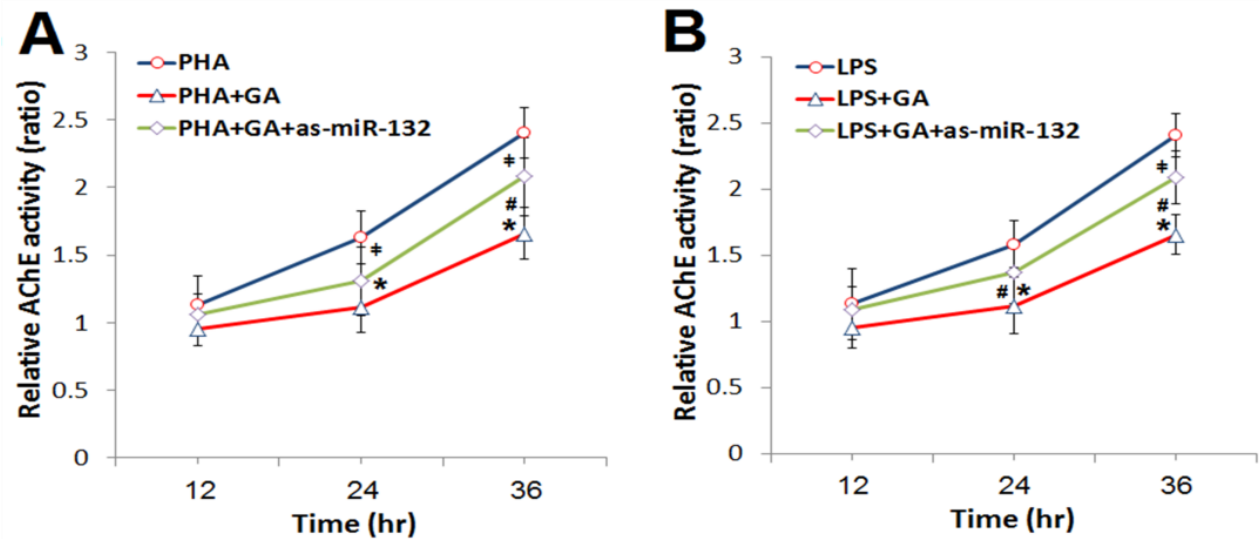

**S4 Fig. GA suppresses AChE activity in CD4<sup>+</sup> T cells and macrophages.** AChE catalytic activity in culture supernatant of (A) CD4<sup>+</sup> T cells isolated from naive mice and stimulated with PHA and (B) peritoneal macrophages were stimulated with LPS. The PHA-stimulated CD4<sup>+</sup> T cells and LPS-stimulated macrophages were electroporated with antisense (as)-miR-132, and cells treated with PHA, PHA+GA, LPS and LPS+GA were electroporated with scramble hairpin inhibitor. Data were pooled from independent experiments and shown as mean  $\pm$  SD. \* $p < 0.05$ , PHA+GA versus PHA, and LPS+GA versus LPS; † $p < 0.05$ , PHA+GA+as-miR-132 versus PHA, and LPS+GA+as-miR-132 versus LPS; # $p < 0.05$ , PHA+GA versus PHA+GA+as-miR-132, and LPS+GA versus LPS+GA+as-miR-132.
